# Supplementary material for: Highly expressed ACSF2 may determine the butyrate metabolic preference of the rumen epithelium
Source: Research Square preprint supplement (doi:10.21203/rs.3.rs-8528676/v1), 2026-01-08
Supplement: Supplementary file 1 [file 54680e67ffe249f3edf5a41e.xlsx]

## Sheet: Primer
Primer	Sequence 5'-3'
Sheep POLR2G-F	ACTTCGGCCCTAACTTGCTC
Sheep POLR2G-R	TGGTGGTGACGGCAATTACA
Sheep ACSF2-F	CGGAAGACCGAGGAAGCAAT
Sheep ACSF2-R	TATCCTTAGACCGGCCCACA
Sheep HMGCS2-F	CTTACGGGCCCTGGACAAAT
Sheep HMGCS2-R	CATCGAGAGTGAAAGGCCGA
Sheep BDH1-F	AAAGCAGCAGAGGTCATCCG
Sheep BDH1-R	GGTGAACTCCACGTCTCCAA
Sheep ACSS1-F	CTGGTGGCAGACAGAAACGG
Sheep ACSS1-R	AGAACGGGAACAATGCCGAA
Sheep ACSS2-F	GAGAAGTGTCAGGAGAAGGGT
Sheep ACSS2-R	CTTGGGTTTCTCTTTCGGCTT
Sheep ACSS3-F	GGTGGCAAACTGAGACTGGA
Sheep ACSS3-R	AACGCTCCAGGTGGTAATGG
Sheep ACSM1-F	ATTCTGGCTACCTTGGGGTC
Sheep ACSM1-R	AGTGGGGAACCTAAGACTGGTG
Sheep ACSM3-F	GCCTGGCTCAATGGGAAAAC
Sheep ACSM3-R	CCAAGTGGTCGGTTAGGTCG
Sheep ACSM4-F	GGTCCCAAAAAGAGAAGACAGGA
Sheep ACSM4-R	ACTCTGGGATTCGGGGAAGA
Sheep ACSM5-F	CCACGATCTTCCGTCTGCTT
Sheep ACSM5-R	TGGCACAGATTAGAACGGTTT

## Sheet: sgRNA
sgRNA	Sequence 5'-3'
ACSF2 sg-1	tcgggatgctgcgcgtcgca
ACSF2 sg-2	ttgagtatcggcctccgcaa

## Sheet: Antibody
Name	Company	Cat#	Lot#
Pan-KERATIN	Proteintech	26411-1-AP	114765
HA Tag	Genescript	A01244	19L002034
ACSF2	Protrintech	16140-1-AP	68772
β-ACTIN	Servicebio	GB12001	HB2111014A
COX4	Abclonal	A6564	3561123005
TUBULIN	Sangon	D191046	H508AA0104
Goat Anti-Mouse IgG(H+L)-Dylight 488	Biogot	BS10015	CL89330
Goat Anti-Rabbit IgG(H+L)-HPR	Biogot	BS13278	AB54161
